# Supplementary material for: HSF1 Regulates Mevalonate and Cholesterol Biosynthesis Pathways
Source: PubMed Central journal article supplement (PMC6769575; doi:10.3390/cancers11091363), 2019-09-13

## Supplementary Materials: HSF1 Regulates Mevalonate and Cholesterol Biosynthesis Pathways

Hyeji Kang, Taerim Oh, Young Yil Bahk, Geon-Hee Kim, Sang-Yeon Kan, Dong Hoon Shin, Ji Hyung Kim and Ji-Hong Lim

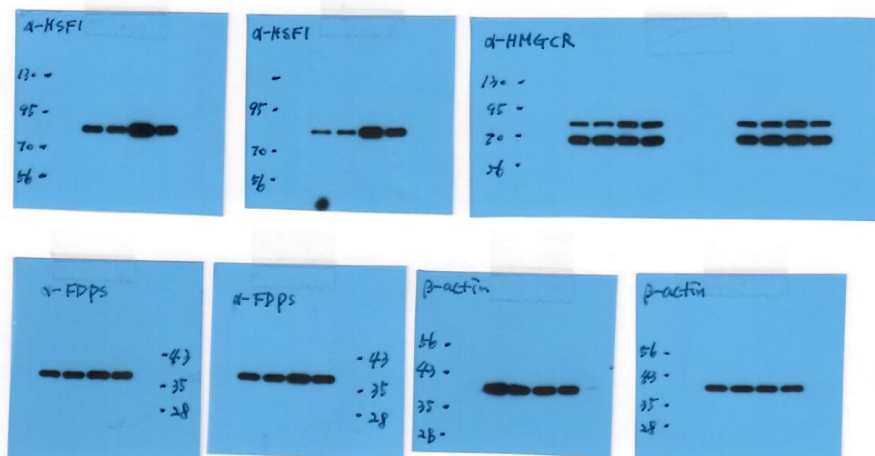

Figure 1D

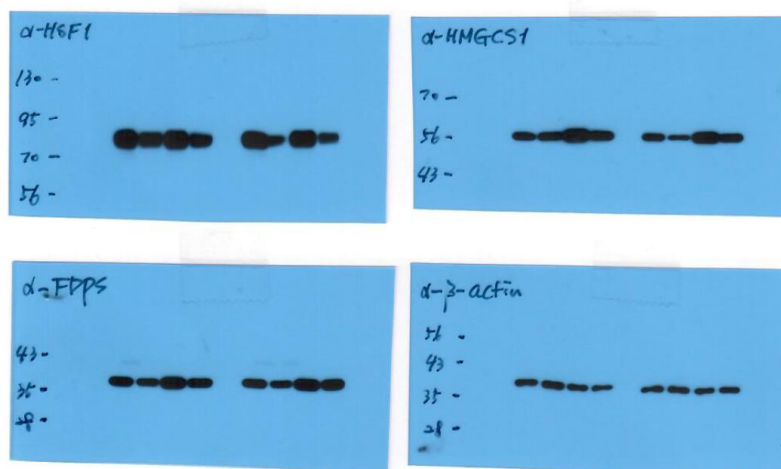

Figure 2A,B

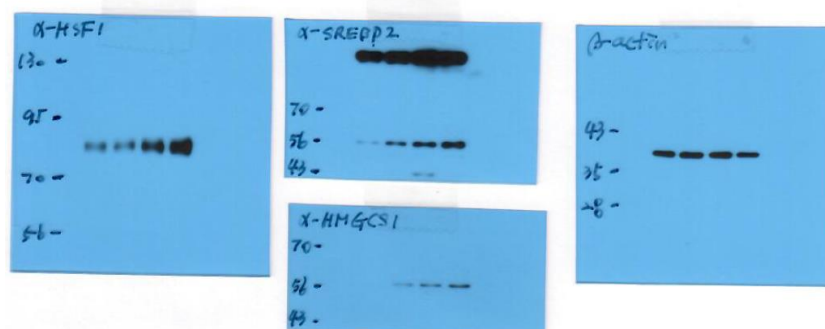

Figure 3E

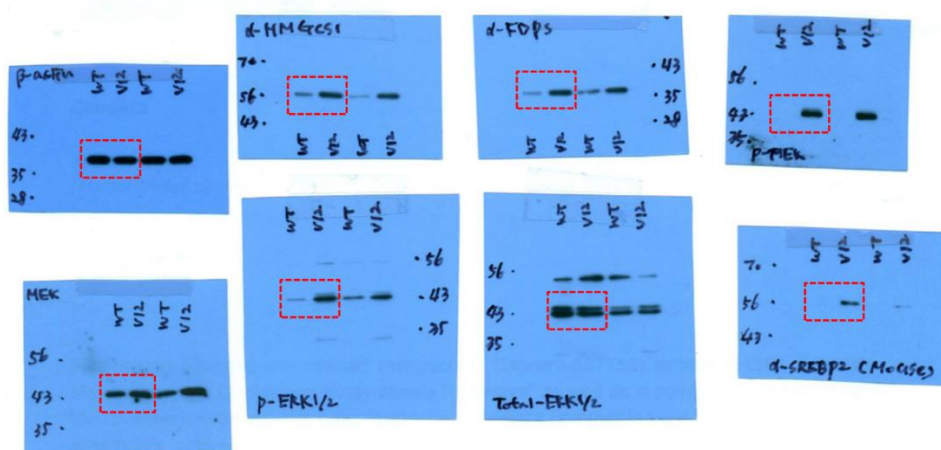

Figure 4B

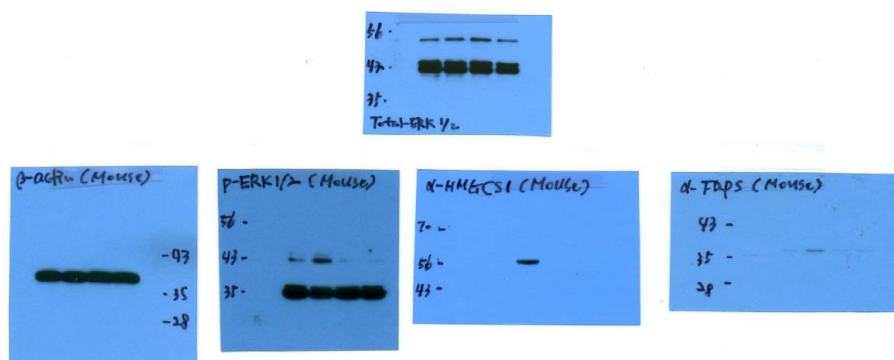

Figure 4D

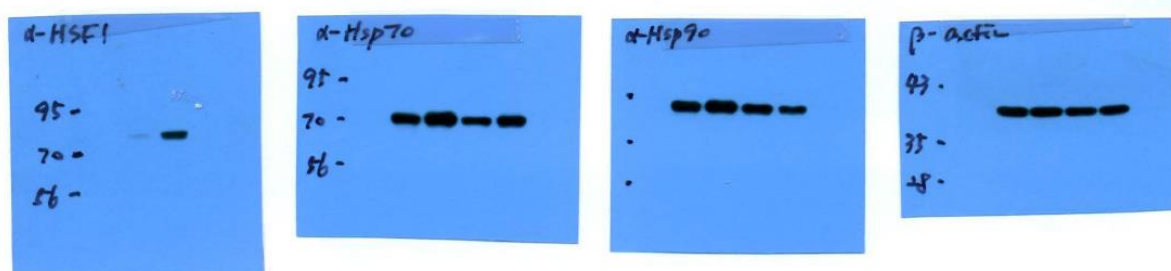

Figure 5B

Figure S1. Whole Scan of Western Blots Film.

**Table S1.** Densitometry analysis of Western Blots. All band intensities were normalized to control band in each experimental group.

| <b>Figure 1D</b> |      |      |        |     |      |     |        |     |
|------------------|------|------|--------|-----|------|-----|--------|-----|
|                  | DMSO |      | Statin |     | DMSO |     | Statin |     |
|                  | -    | +    | -      | +   | -    | +   | -      | +   |
| KRIBB11          | -    | +    | -      | +   | -    | +   | -      | +   |
| HMGCS1           | 1    | 0.95 | 8.4    | 3.6 | 1    | 1.2 | 9.8    | 4.1 |
| HMGCR            | 1    | 1.6  | 1.1    | 1.3 | 1    | 1.5 | 1.4    | 1.1 |
| FDPS             | 1    | 1.3  | 1.7    | 1.5 | 1    | 1.2 | 2.1    | 1.5 |
| $\beta$ -actin   | 1    | 0.9  | 0.9    | 0.8 | 1    | 1.1 | 1      | 1   |

  

| Figure 2A      |      |        |             | Figure 2B |      |        |             |        |
|----------------|------|--------|-------------|-----------|------|--------|-------------|--------|
|                | DMSO |        | Simvastatin |           | DMSO |        | Simvastatin |        |
| shRNA          | Scr  | HSF1#1 | Scr         | HSF1#1    | Scr  | HSF1#2 | Scr         | HSF1#2 |
| HSF1           | 1    | 0.7    | 1           | 0.6       | 1    | 0.3    | 1           | 0.4    |
| HMGCS1         | 1    | 1.1    | 2.4         | 1.5       | 1    | 0.4    | 2.8         | 1.7    |
| FDPS           | 1    | 0.8    | 1.9         | 1.1       | 1    | 0.8    | 1.7         | 1.5    |
| $\beta$ -actin | 1    | 1.1    | 0.9         | 0.8       | 1    | 1      | 0.9         | 0.9    |

  

| <b>Figure 3E</b>  |              |       |     |     |
|-------------------|--------------|-------|-----|-----|
| Heat Shock (hour) | 0            | 0.5 h | 1 h | 2 h |
| HSF1              | 1            | 1.1   | 2.2 | 4.9 |
| SREBP2            | 1            | 1.9   | 2.3 | 3.1 |
| HMGCS1            | Not detected | 1     | 1.8 | 2.3 |
| $\beta$ -actin    | 1            | 1.1   | 1   | 0.8 |

  

| <b>Figure 4B</b> |                     |                      |
|------------------|---------------------|----------------------|
| H-Ras            | H-Ras <sup>WT</sup> | H-Ras <sup>V12</sup> |
| p-ERK1/2         | 1                   | 3.2                  |
| ERK1/2           | 1                   | 1.1                  |
| p-MEK            | Not detected        | 1                    |
| MEK              | 1                   | 1.4                  |
| HMGCS1           | 1                   | 2.9                  |
| FDPS             | 1                   | 3.1                  |
| SREBP2           | Not detected        | 1                    |
| $\beta$ -actin   | 1                   | 1                    |

  

| <b>Figure 4D</b> |                     |                      |                     |                      |
|------------------|---------------------|----------------------|---------------------|----------------------|
| H-Ras            | H-Ras <sup>WT</sup> | H-Ras <sup>V12</sup> | H-Ras <sup>WT</sup> | H-Ras <sup>V12</sup> |
| PD98059          | -                   | -                    | +                   | +                    |
| p-ERK1/2         | 1                   | 1.9                  | 0.2                 | 0.2                  |
| ERK1/2           | 1                   | 1                    | 1                   | 0.8                  |
| HMGCS1           | Not detected        | 1                    | Not detected        | Not detected         |
| FDPS             | 1                   | 2.8                  | 0.8                 | 1.2                  |
| $\beta$ -actin   | 1                   | 1                    | 1                   | 1                    |

  

| <b>Figure 5B</b> |                     |                      |                     |                      |
|------------------|---------------------|----------------------|---------------------|----------------------|
| H-Ras            | H-Ras <sup>WT</sup> | H-Ras <sup>V12</sup> | H-Ras <sup>WT</sup> | H-Ras <sup>V12</sup> |
| PD98059          | -                   | -                    | +                   | +                    |
| HSF1             | Not detected        | 1                    | Not detected        | Not detected         |
| Hsp70            | 1                   | 1.6                  | 0.8                 | 0.9                  |
| Hsp90            | 1                   | 1.8                  | 1                   | 0.8                  |
| $\beta$ -actin   | 1                   | 1                    | 0.9                 | 0.9                  |

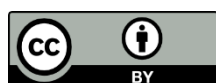

Supplement: cancers-11-01363-s001.pdf [file cancers-11-01363-s001.pdf]
